# Supplementary material for: Corneal confocal microscopy is a rapid reproducible ophthalmic technique for quantifying corneal nerve abnormalities
Source: PubMed Central journal article supplement (PMC5560560; doi:10.1371/journal.pone.0183040), 2017-08-17
Supplement: pone.0183040.s001.pdf [file pone.0183040.s001.pdf]

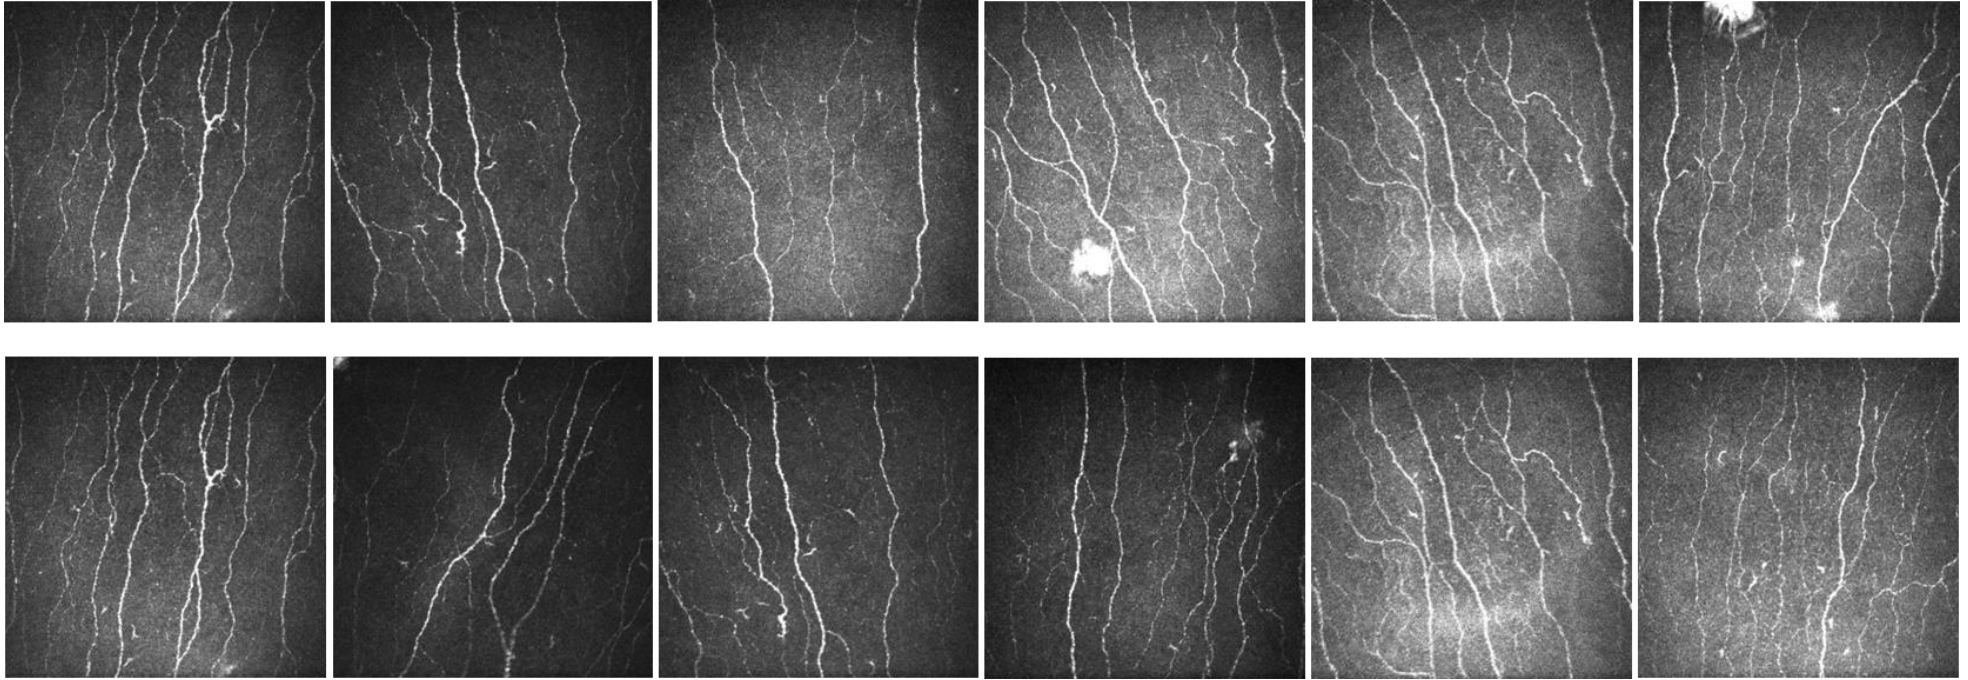

**S1 figure:** first row, 6 CCM images from central sub basal nerve plexus exported by expert; second row, 6 CCM images from the same patients but exported by a beginner.
