# Supplementary material for: Corneal confocal microscopy is a rapid reproducible ophthalmic technique for quantifying corneal nerve abnormalities
Source: PubMed Central journal article supplement (PMC5560560; doi:10.1371/journal.pone.0183040), 2017-08-17
Supplement: pone.0183040.s002.pdf [file pone.0183040.s002.pdf]

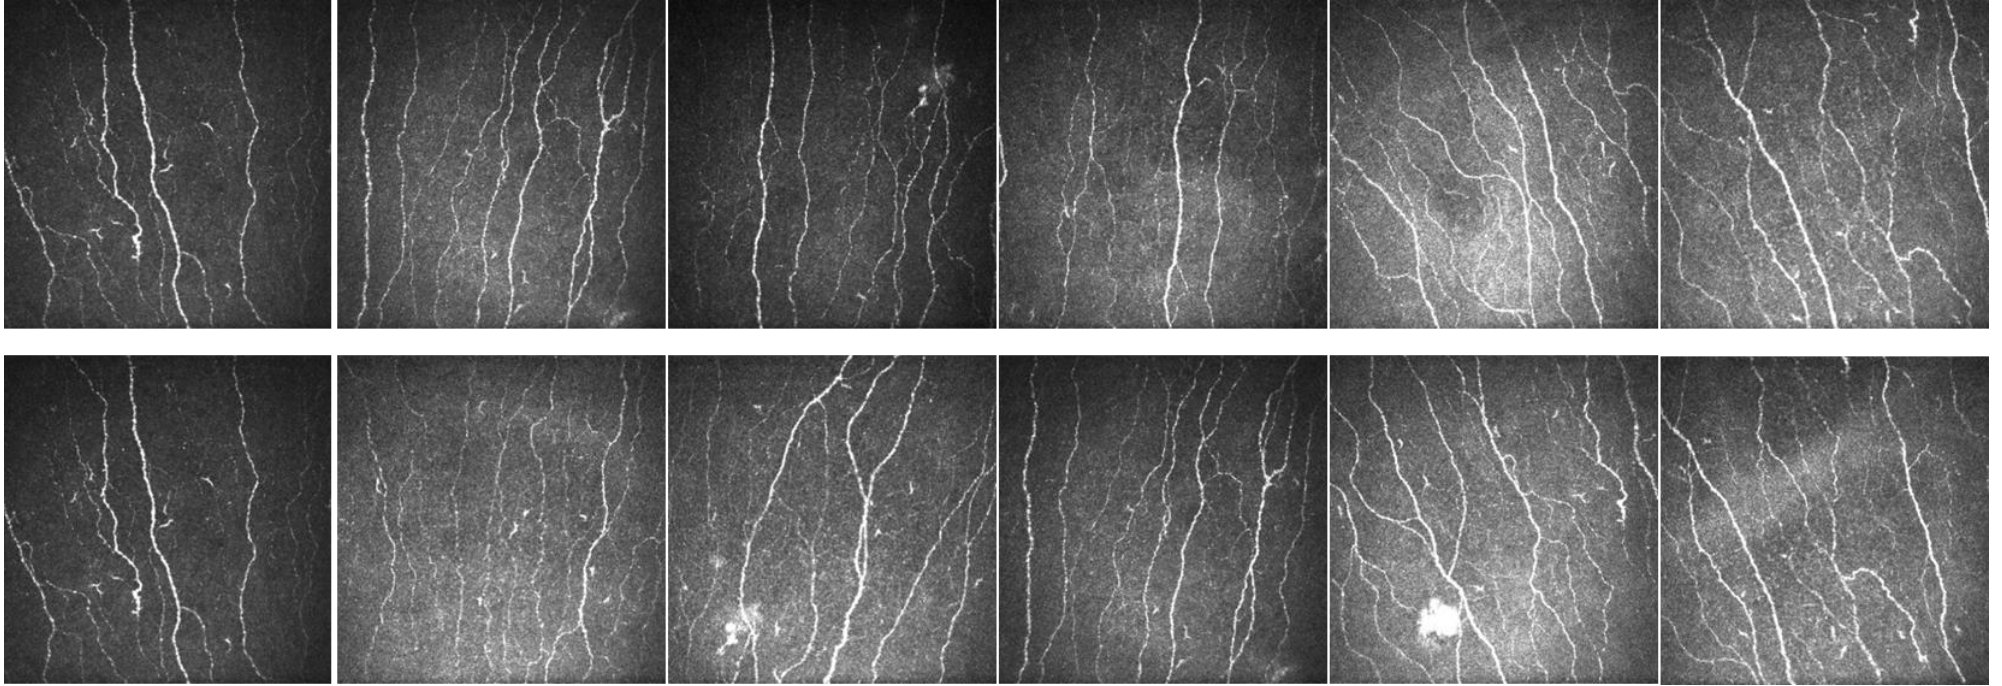

**S2 figure:** First row, 6 CCM images from central sub basal nerve plexus exported by an expert (OB2a) in first occasion; second row, CCM images exported by the same examiner (OB2b) from the same patient in the second occasion.
